# Supplementary material for: Three-dimensional porous copper-decorated bismuth-based nanofoam for boosting the electrochemical reduction of CO2 to formate
Source: Royal Society of Chemistry journal article supplement (doi:10.1039/d1qi00065a), 2021-01-01
Supplement: d1qi00065a1.pdf [file d1qi00065a1.pdf]

## Electronic Supplementary Information

### **Three-dimensional porous copper-decorated bismuth-based nanofoam for boosting electrochemical reduction of CO<sub>2</sub> to formate**

Yingchun Zhang,<sup>a,b</sup> Changsheng Cao,<sup>a,b,\*</sup> Xin-Tao Wu<sup>a,b,c</sup> and Qi-Long Zhu<sup>a,b,c,\*</sup>

<sup>a</sup> State Key Laboratory of Structural Chemistry, Fujian Institute of Research on the Structure of Matter, Chinese Academy of Sciences (CAS), Fuzhou 350002, China

<sup>b</sup> University of Chinese Academy of Sciences, Beijing 100049, China

<sup>c</sup> Fujian Science & Technology Innovation Laboratory for Optoelectronic Information of China, Fuzhou 350108, China

\*Corresponding Author E-mail: [cscao@fjirsm.ac.cn](mailto:cscao@fjirsm.ac.cn), [qlzhu@fjirsm.ac.cn](mailto:qlzhu@fjirsm.ac.cn)

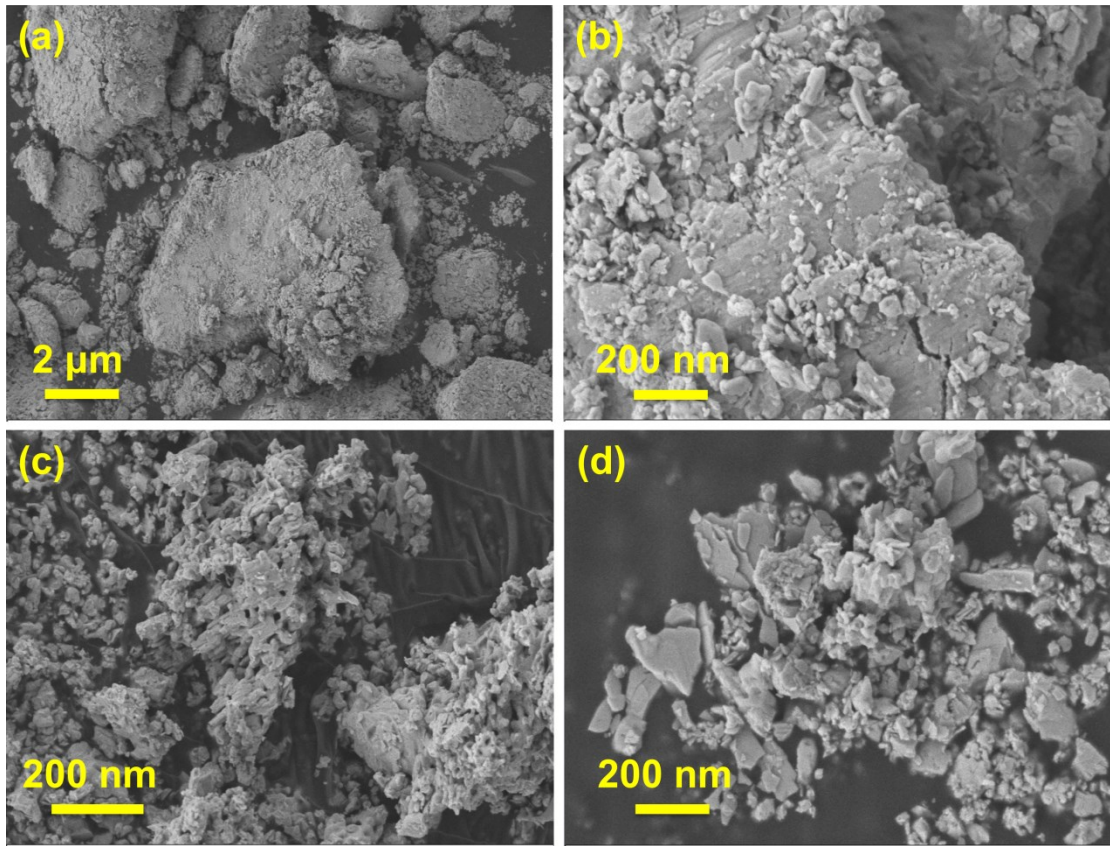

Fig. S1 SEM images of (a, b) commercial bulk Bi and (c, d) P-Bi.

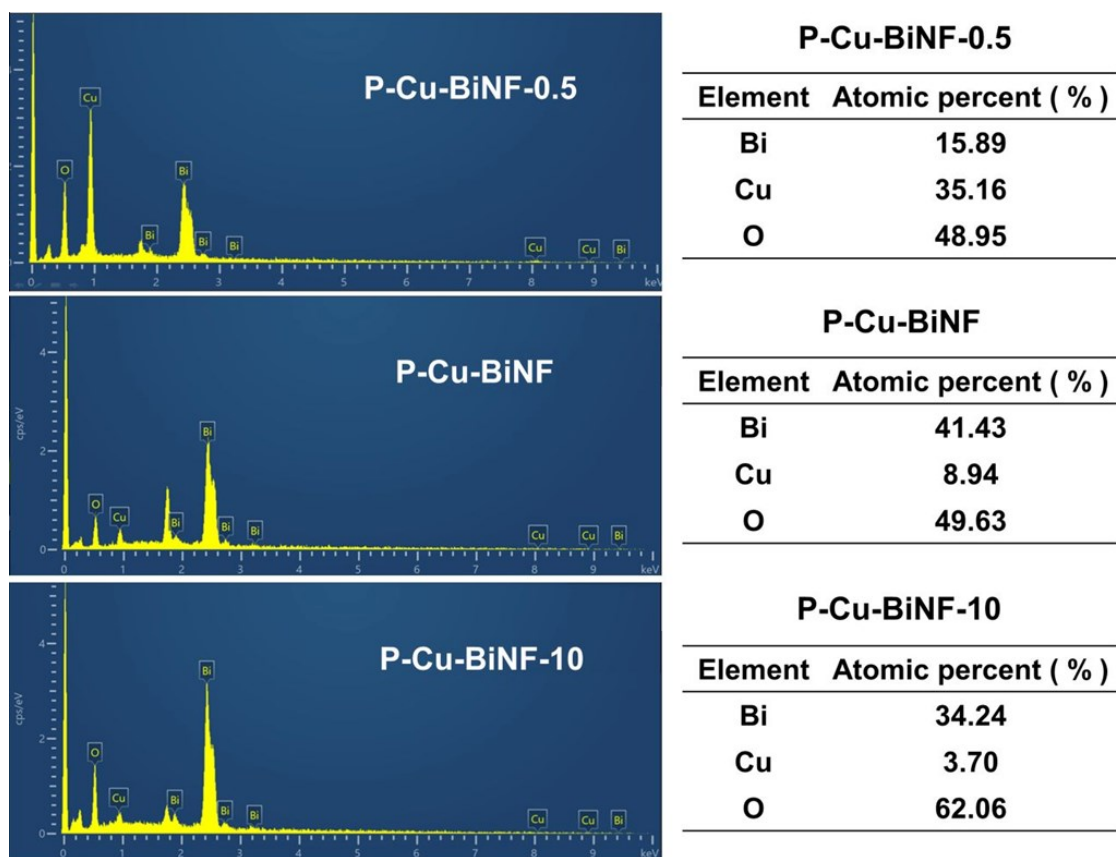

Fig. S2 SEM-EDX images of P-Cu-BiNF-0.5, P-Cu-BiNF and P-Cu-BiNF-10.

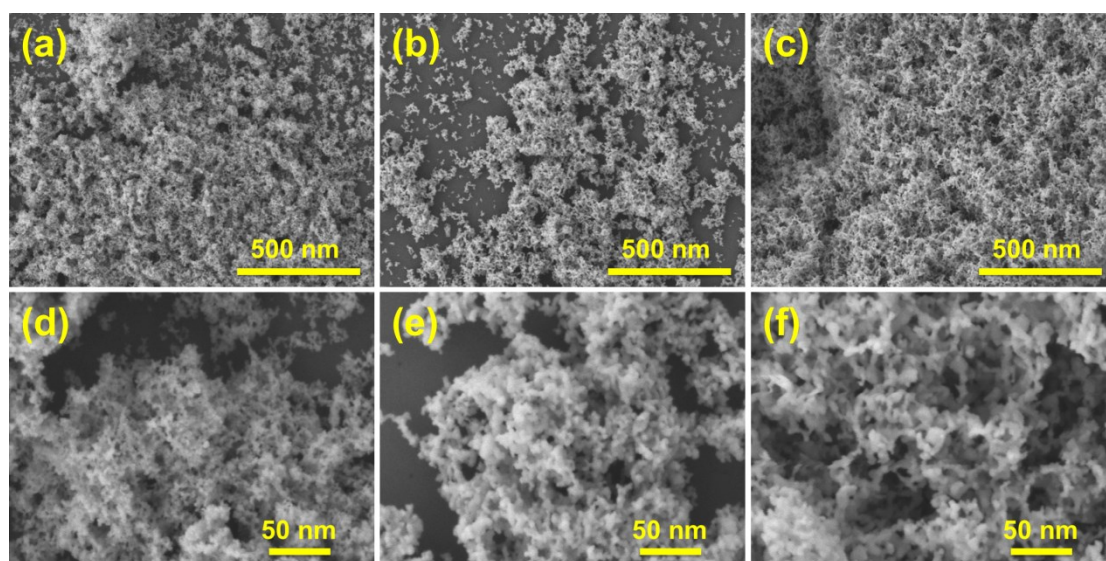

Fig. S3 SEM images of (a, d) P-Cu-BiNF-0.5, (b, e) P-Cu-BiNF and (c, f) P-Cu-BiNF-10.

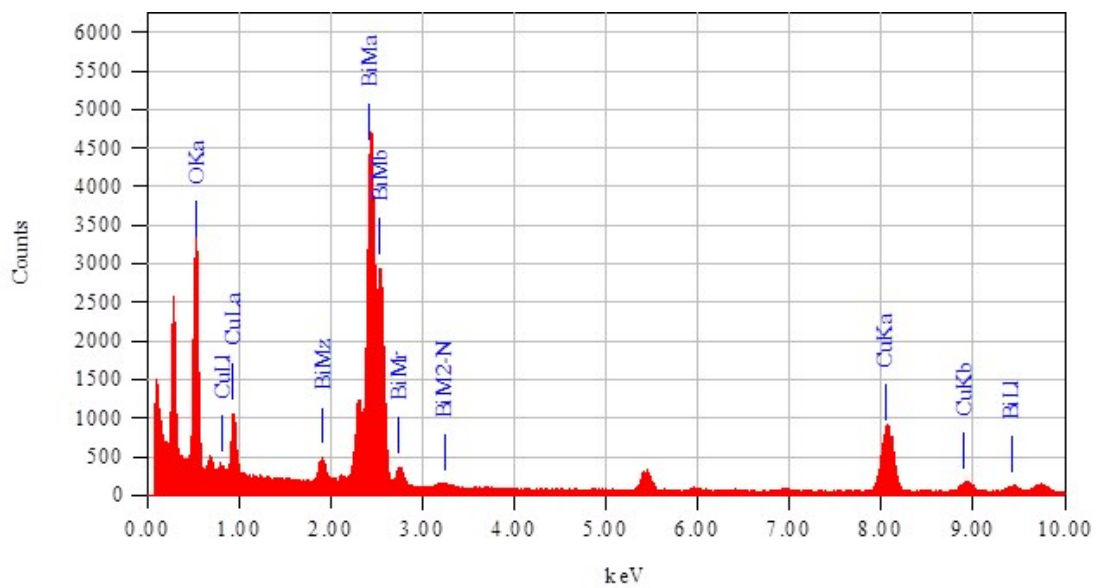

| Element | Atom% | Atom% | Atom% | Average atom% |
|---------|-------|-------|-------|---------------|
| Bi      | 27.06 | 30.47 | 27.37 | 28.30         |
| Cu      | 12.21 | 12.62 | 12.26 | 12.36         |
| O       | 60.73 | 56.91 | 60.38 | 59.34         |

Fig. S4 TEM-EDX images of P-Cu-BiNF.

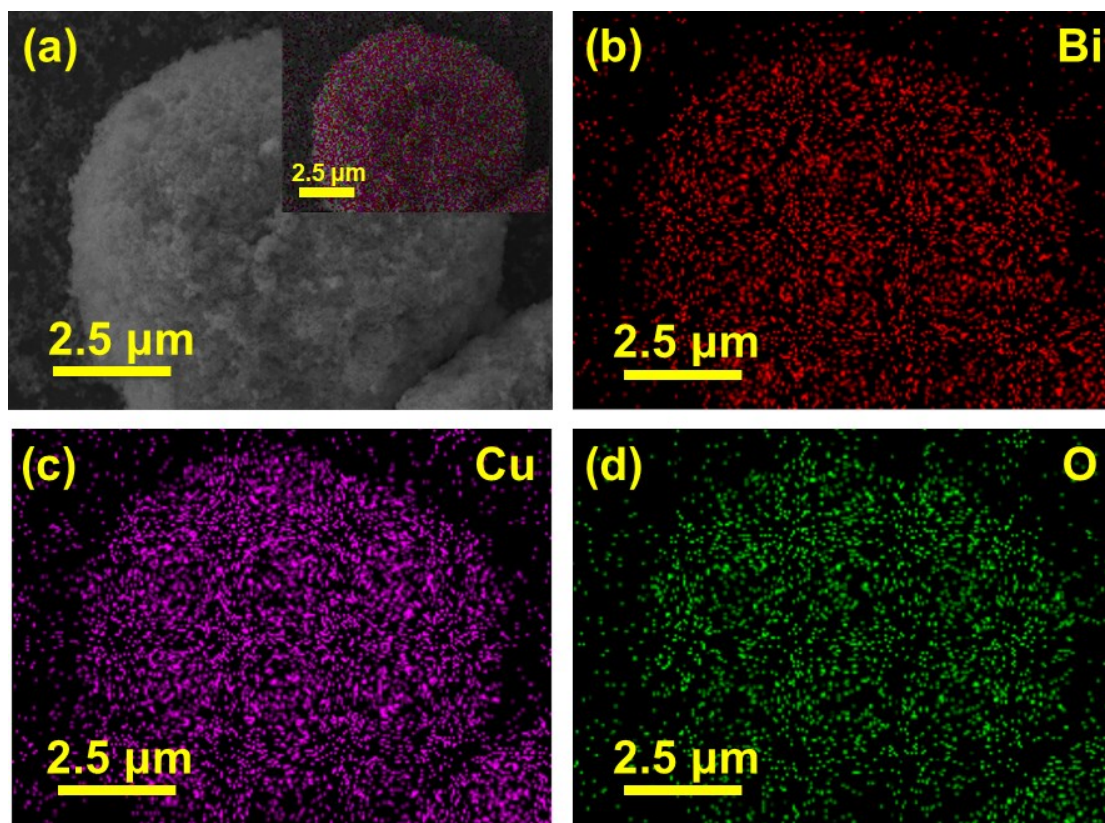

Fig. S5 SEM-Mapping images of P-Cu-BiNF-0.5.

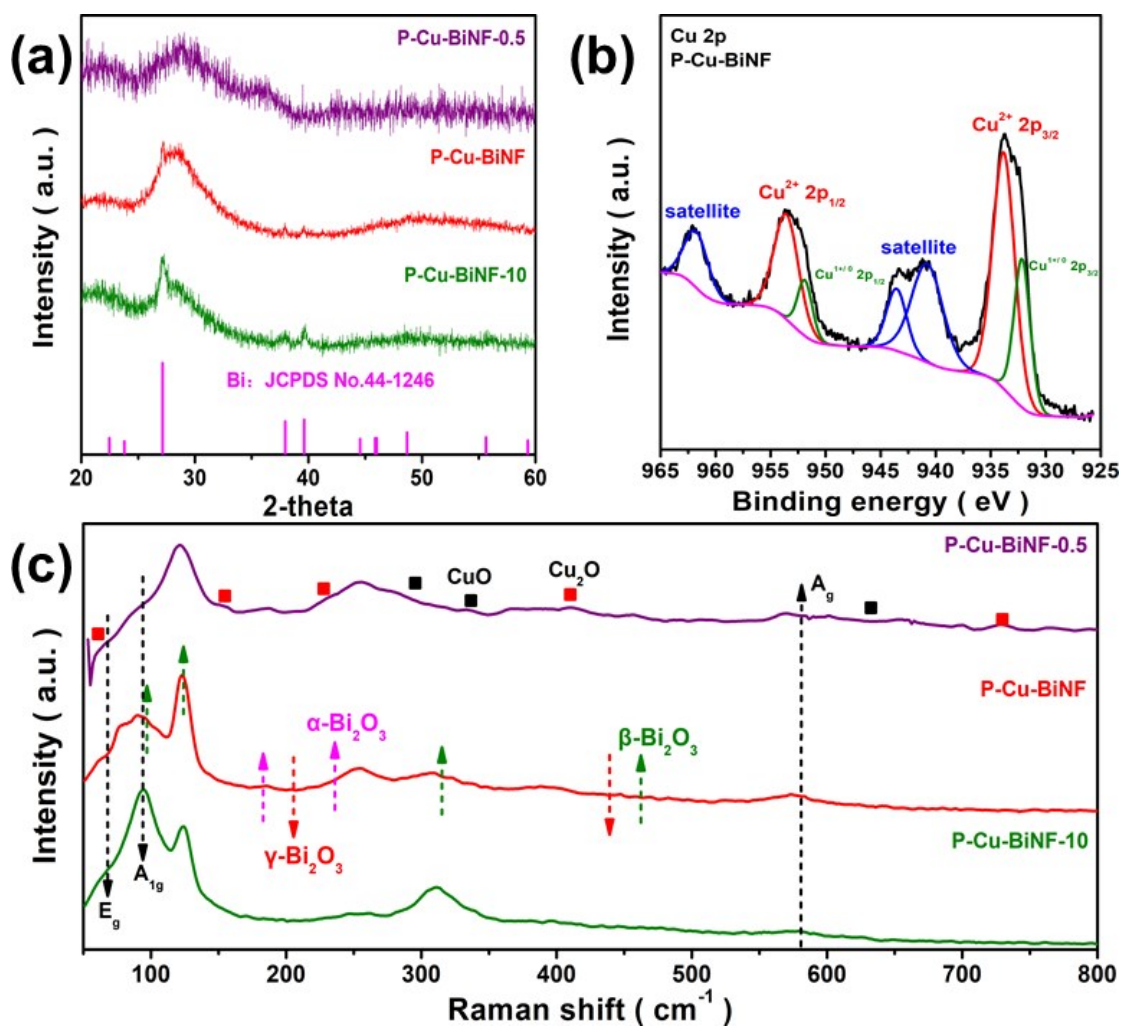

Fig. S6 (a) PXRD patterns. (b) XPS Cu 2p spectra of P-Cu-BiNF. (c) Raman spectra of P-Cu-BiNF-0.5, P-Cu-BiNF and P-Cu-BiNF-10 (the arrows represent Bi and Bi<sub>2</sub>O<sub>3</sub> phases, and the squares represent Cu<sub>2</sub>O and CuO phases).

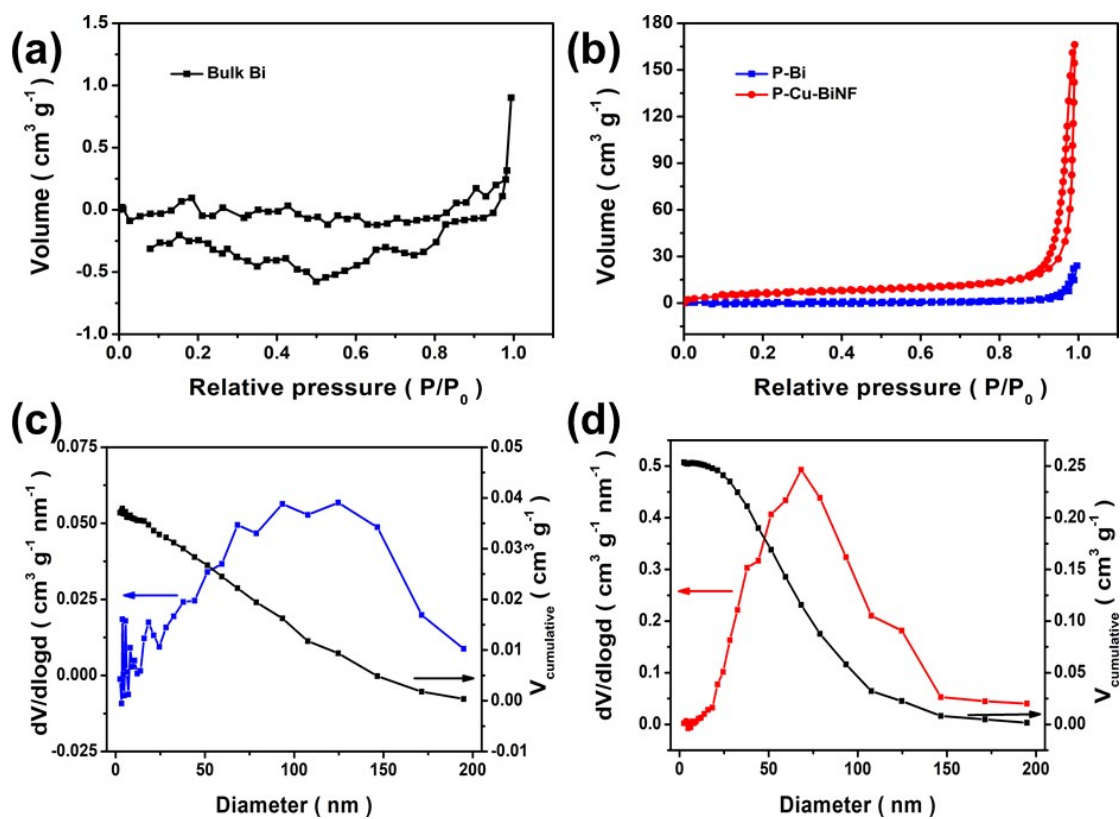

Fig. S7 (a)  $\text{N}_2$  sorption isotherm for bulk Bi. (b)  $\text{N}_2$  sorption isotherm for P-Bi and P-Cu-BiNF. Pore size distributions and cumulative pore volumes ( $V_{\text{cumulative}}$ ) of (c) P-Bi and (d) P-Cu-BiNF.



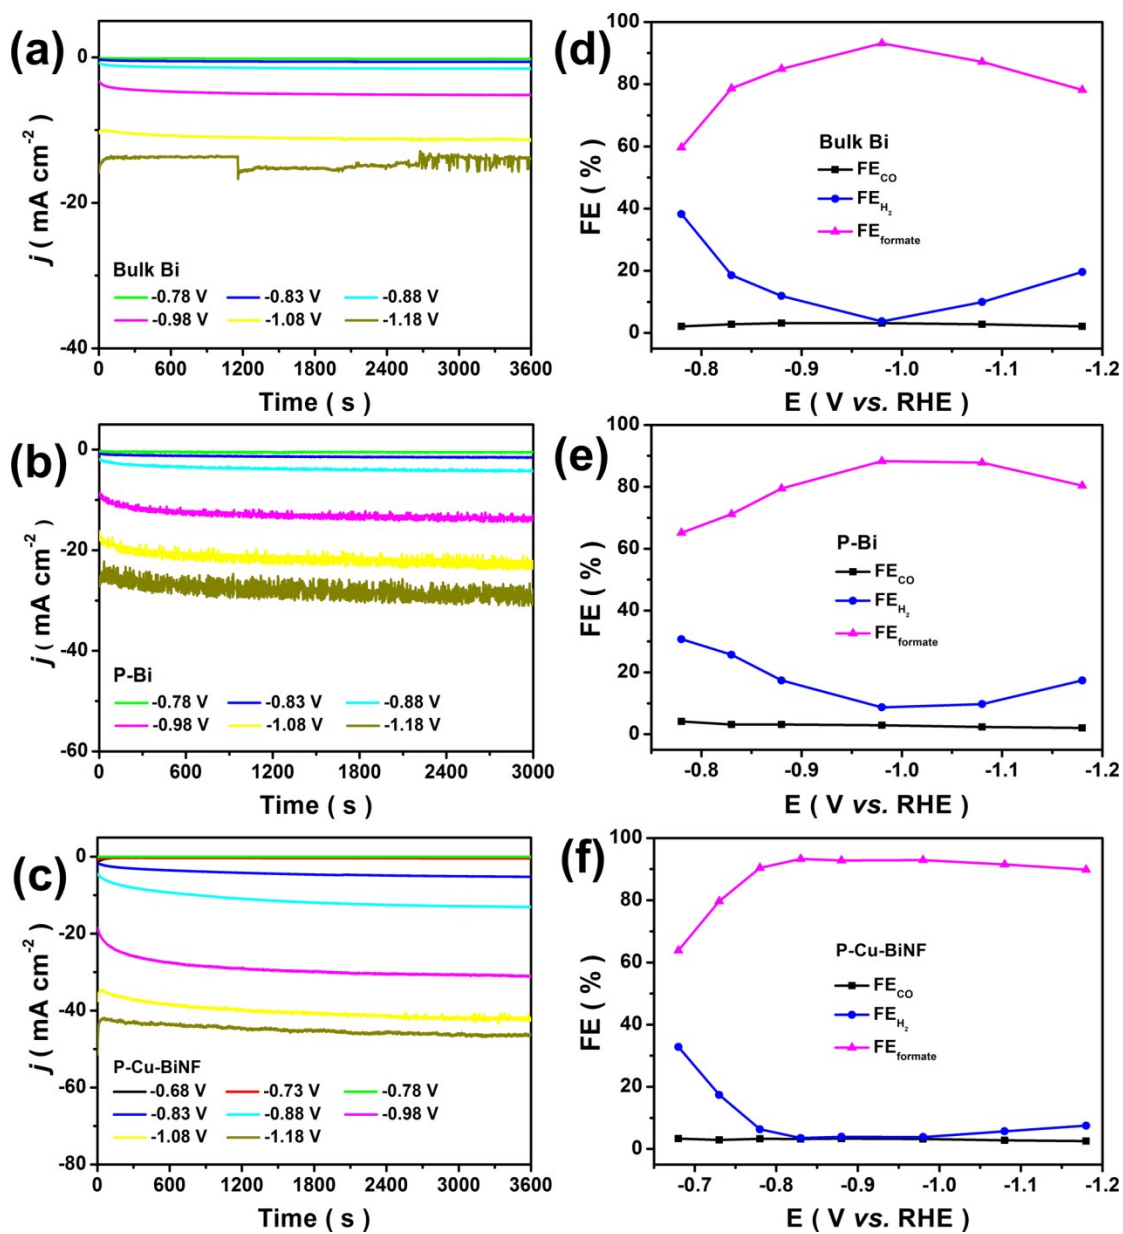

Fig. S8 Potential-dependent  $i-t$  curves and FEs of  $H_2$ , CO and formate for (a, d) bulk Bi, (b, e) P -Bi and (c, f) P-Cu-BiNF.

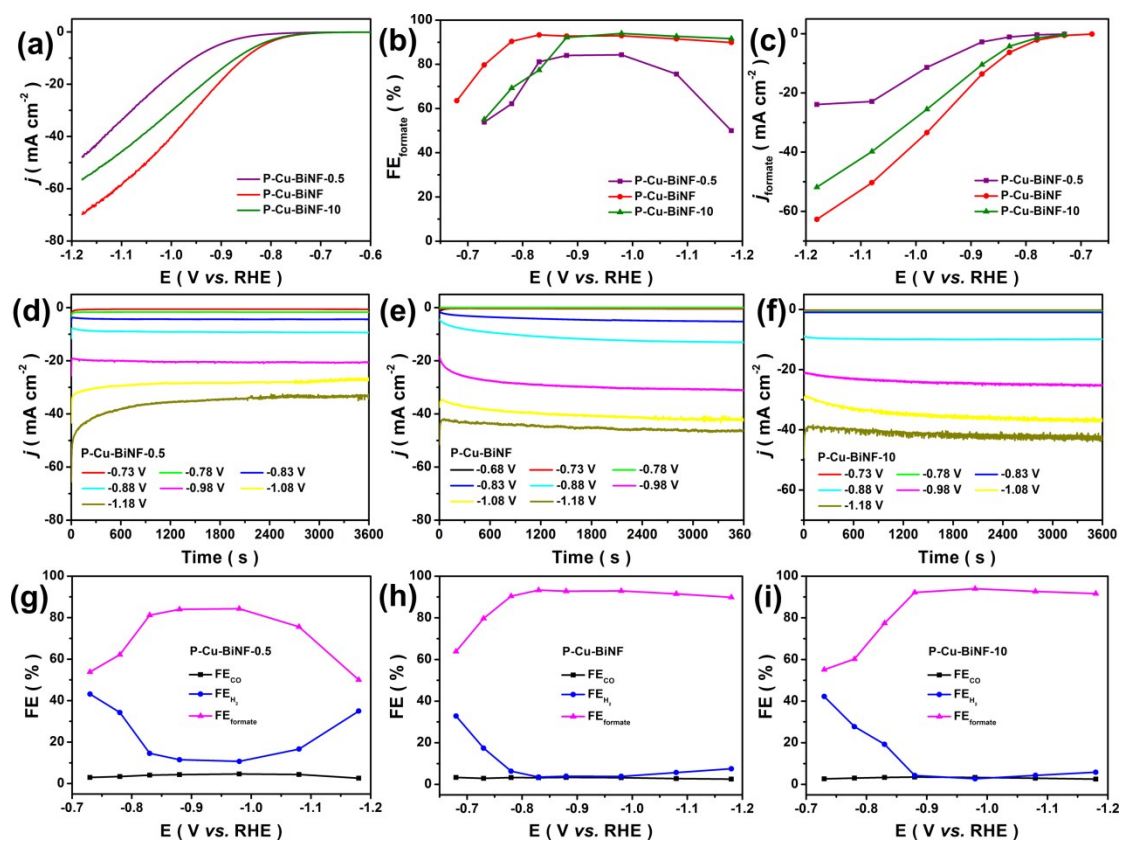

Fig. S9 (a) LSV curves, (b)  $\text{FE}_{\text{formate}}$  and (c)  $j_{\text{formate}}$  for P-Cu-BiNF-0.5, P-Cu-BiNF and P-Cu-BiNF-10; Potential-dependent *i-t* curves and FEs of H<sub>2</sub>, CO and formate for (d, g) P-Cu-BiNF-0.5, (e, h) P-Cu-BiNF and (f, i) P-Cu-BiNF-10.

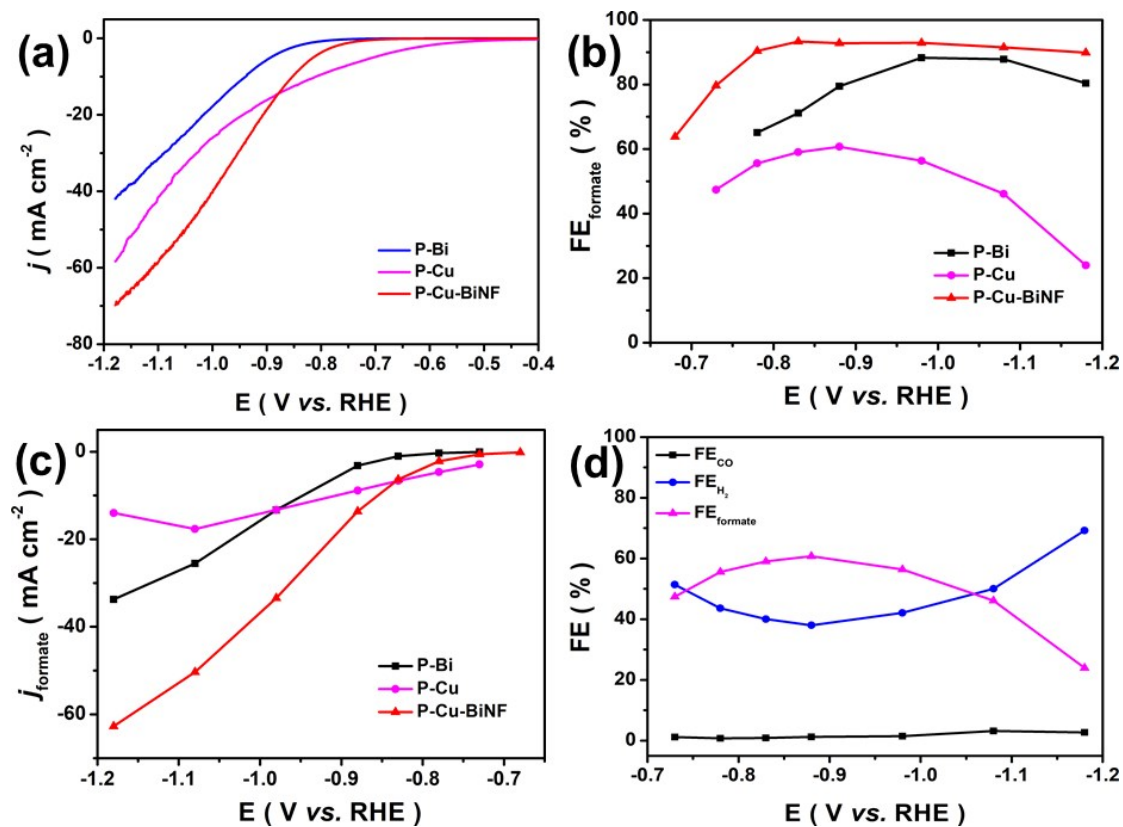

Fig. S10 (a) LSV curves, (b)  $FE_{\text{formate}}$  and (c)  $j_{\text{formate}}$  for P- Bi, P-Cu and P-Cu-BiNF, (d) FEs of H<sub>2</sub>, CO and formate for P-Cu.

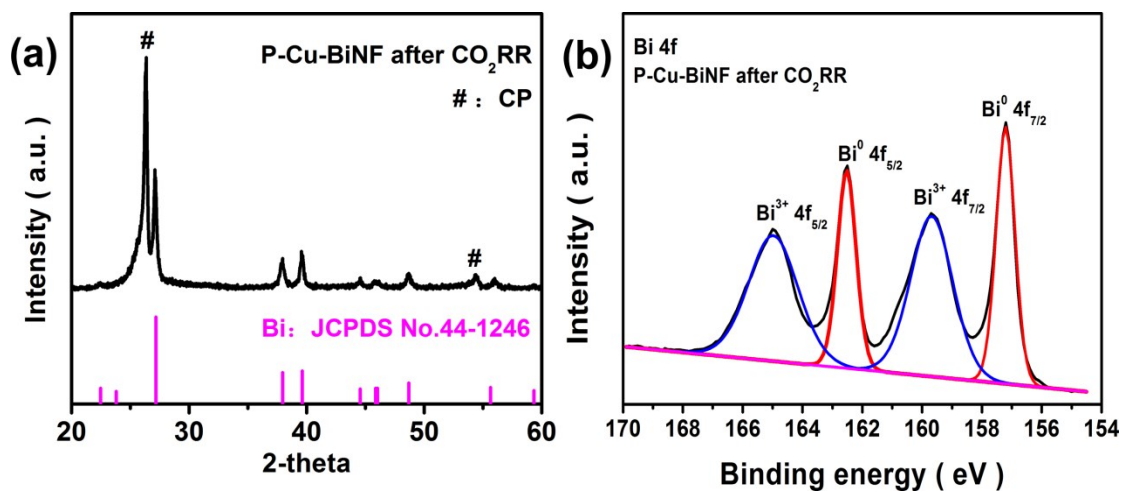

Fig. S11 (a) PXRD pattern and (b) Bi 4f XPS spectrum of P-Cu-BiNF after CO<sub>2</sub>RR. (CP represents carbon paper).

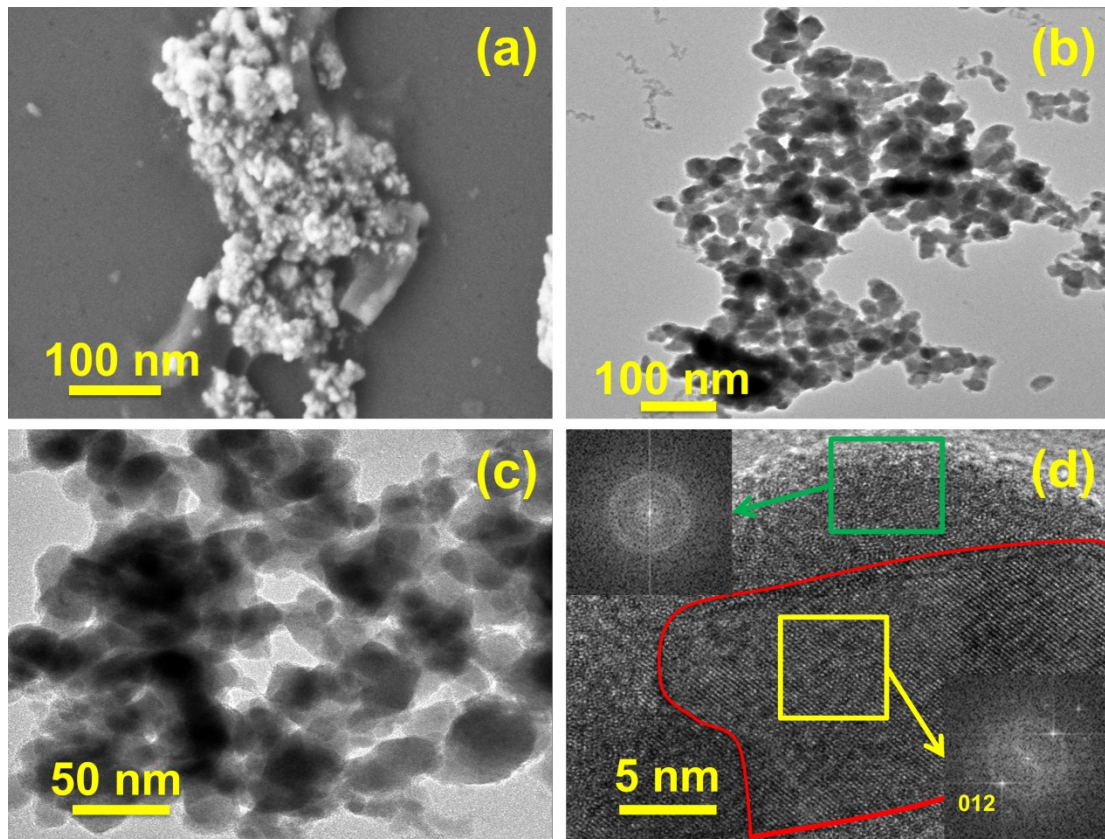

Fig. S12 (a) SEM, (b-c) TEM and (d) HRTEM images of P-Cu-BiNF after CO<sub>2</sub>RR.

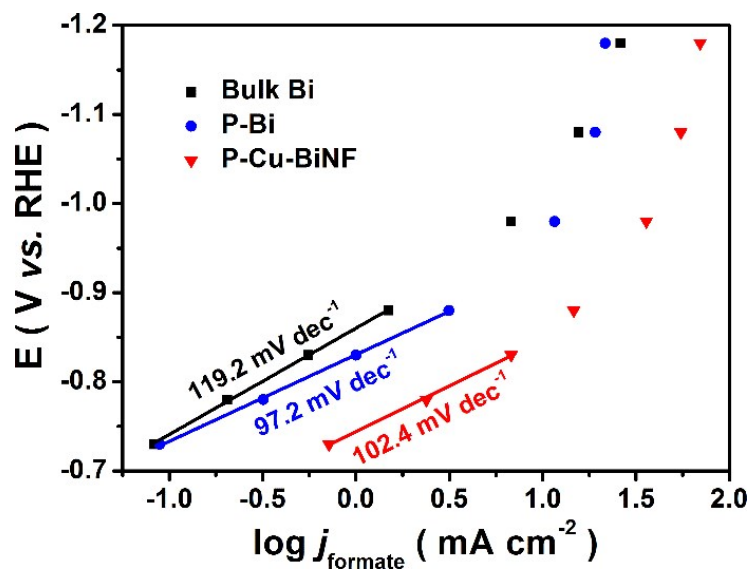

Fig. S13 Tafel plots of P-Cu-BiNF, P-Bi and bulk Bi.

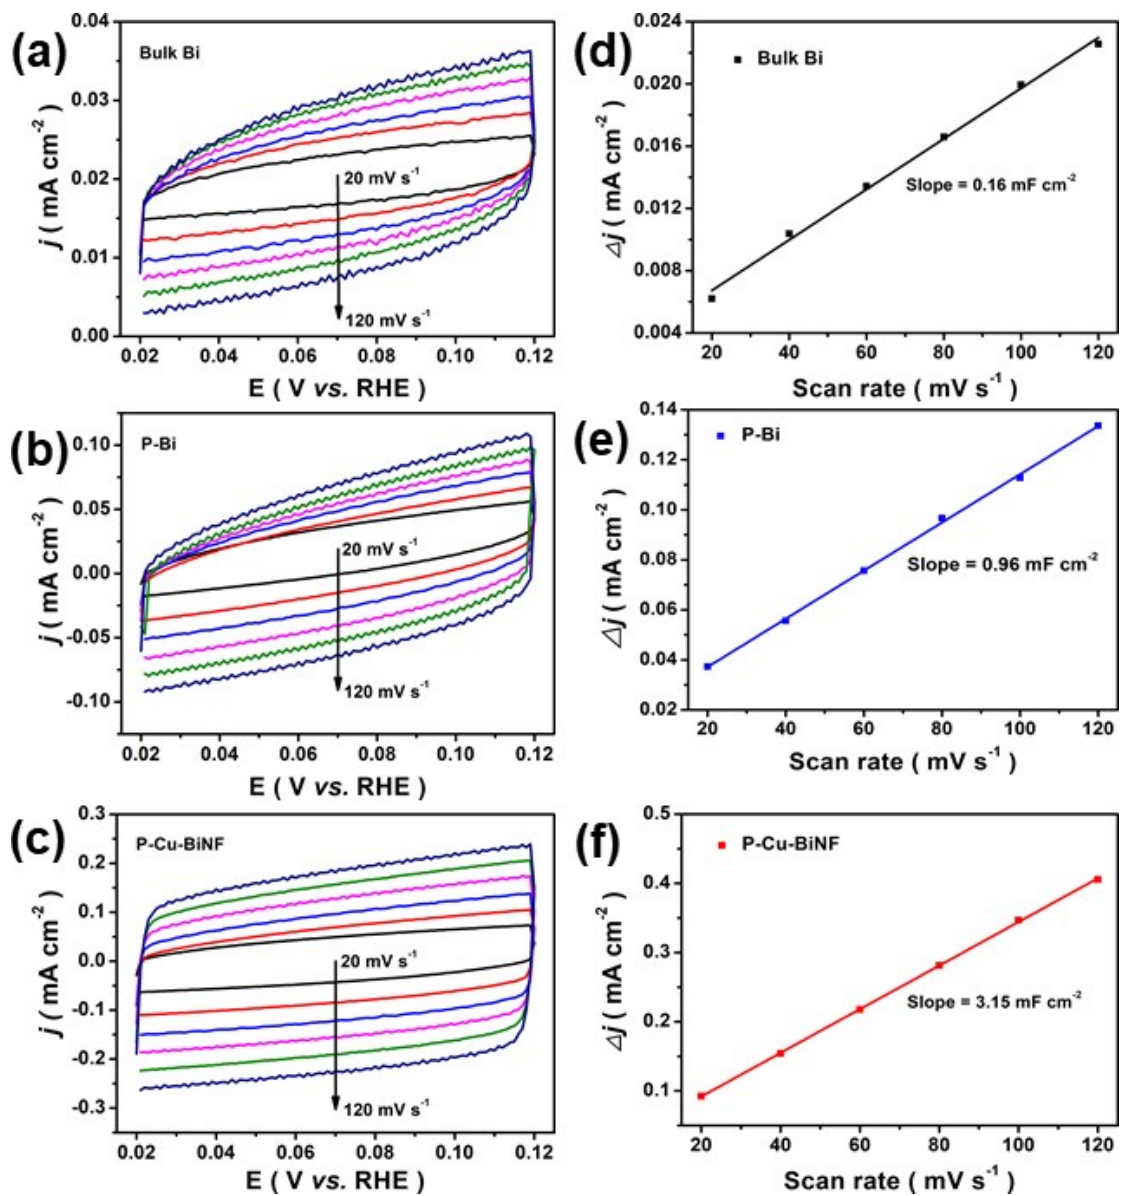

Fig. S14 CV curves at different scan rates and  $\Delta j$  ( $=j_a - j_c$ ) against scan rates for (a, d) bulk Bi, (b, e) P-Bi and (c, f) P-Cu-BiNF.

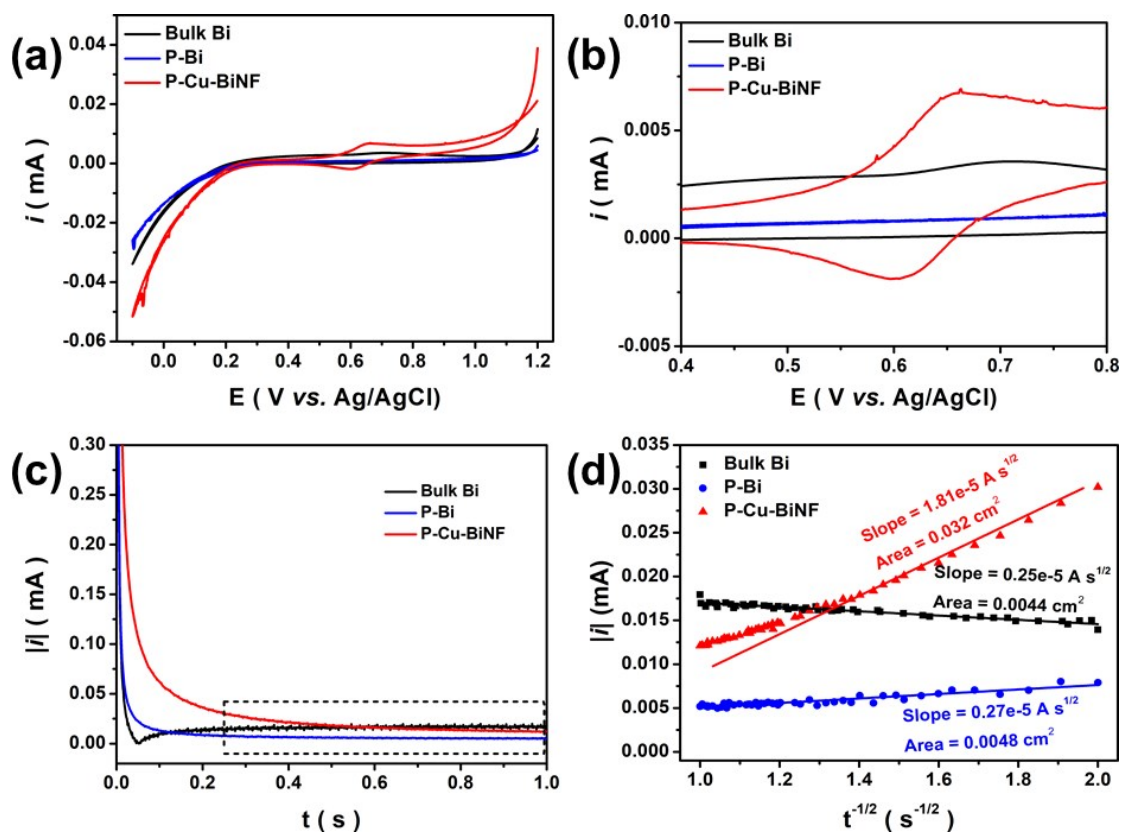

Figure S15 (a) CV curves at the sweep rate of  $5 \text{ mV s}^{-1}$  in  $0.1 \text{ M KCl}$  (containing  $5 \text{ mM K}_3\text{Fe}(\text{CN})_6$ ) over bulk Bi, P-Bi and P-Cu-BiNF. (b) The magnified of (a). (c) Chronoamperometric response recorded in  $0.1 \text{ M KCl}$  (containing  $5 \text{ mM K}_3\text{Fe}(\text{CN})_6$ ) after stepping the potential from  $0.8$  to  $0.1 \text{ V vs. Ag/AgCl}$  over bulk Bi, P-Bi and P-Cu-BiNF. (d) Linearized plot based on the Cottrell equation for bulk Bi, P-Bi and P-Cu-BiNF (The first  $250 \text{ ms}$  were omitted because of double layer charging effects).

The ECSAs of the catalysts were evaluated according to literature.<sup>1</sup> The chronoamperometric response within  $1 \text{ s}$  was recorded after applying the potential from  $0.8$  to  $0.1 \text{ V (vs. Ag/AgCl)}$  in Ar-purged  $0.1 \text{ M KCl}$  (containing  $5 \text{ mM K}_3\text{Fe}(\text{CN})_6$ ). ECSA can be obtained by the following Cottrell equation:

$$i = \frac{nFAC\sqrt{D}}{\sqrt{\pi t}}$$

where  $i$  is the current,  $n = 1$ ,  $D = 4.34 \times 10^{-6} \text{ cm}^2 \text{ s}^{-1}$ ,  $F = 96485 \text{ C mol}^{-1}$ ,  $A$  is ECSA, and  $C$  is the concentration of  $\text{K}_3\text{Fe}(\text{CN})_6$  ( $5 \text{ mM}$ ).



ECSA can be obtained by plotting  $i$  versus  $t^{-1/2}$  and extracting the slope from the linear part. According to the results, the ECSAs of bulk Bi, P-Bi and P-Cu-BiNF were assessed to be 0.0044, 0.0048 and 0.032 cm<sup>2</sup>, respectively. And the ECSAs of P-Cu-BiNF-0.5, P-Cu-BiNF and P-Cu-BiNF-10 with different Cu contents are 0.020, 0.032 and 0.0065 cm<sup>2</sup>, respectively.

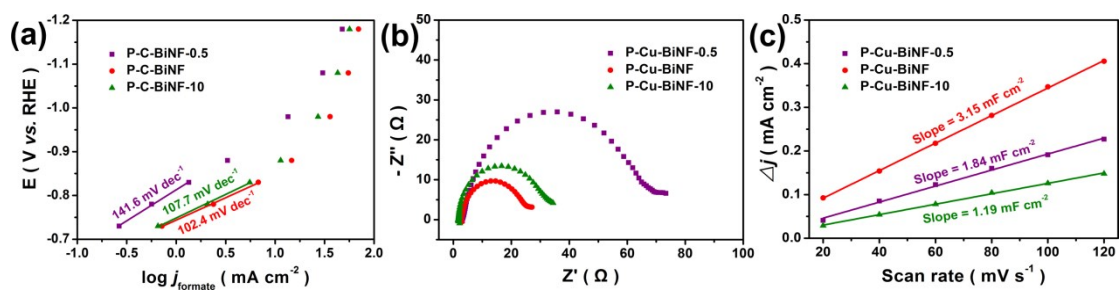

Fig. S16 (a) Tafel plots, (b) electrochemical impedance plots and (c) capacitive  $\Delta j$  ( $= j_a - j_c$ ) against scan rates for P-Cu-BiNF-0.5, P-Cu-BiNF and P-Cu-BiNF-10.

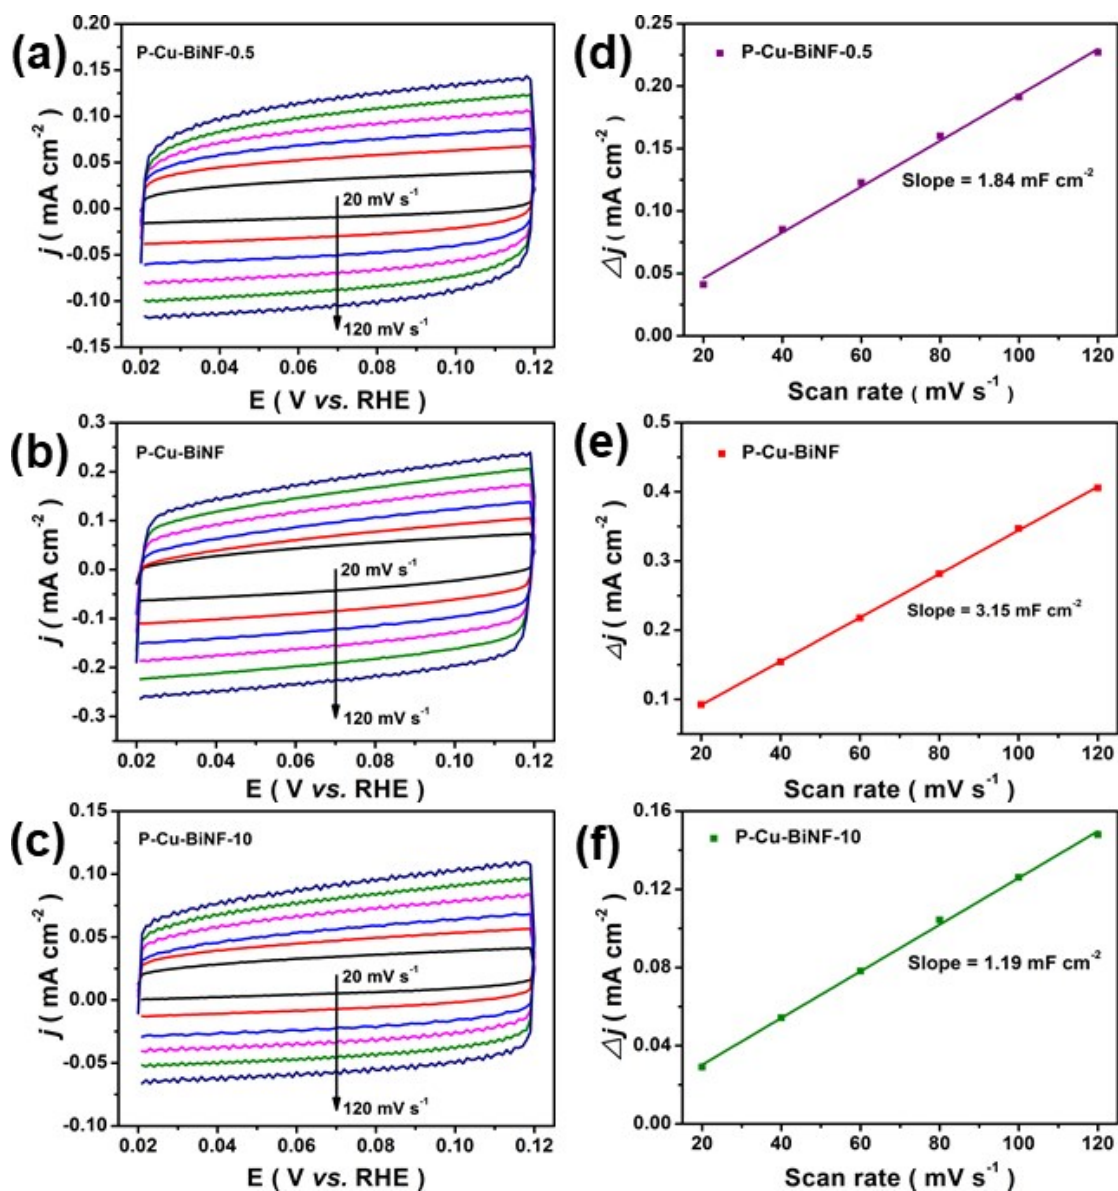

Fig. S17 CV curves at different scan rates and capacitive  $\Delta j$  ( $= j_a - j_c$ ) against scan rates for (a, d) P-Cu-BiNF-0.5, (b, e) P-Cu-BiNF and (c, f) P-Cu-BiNF-10.

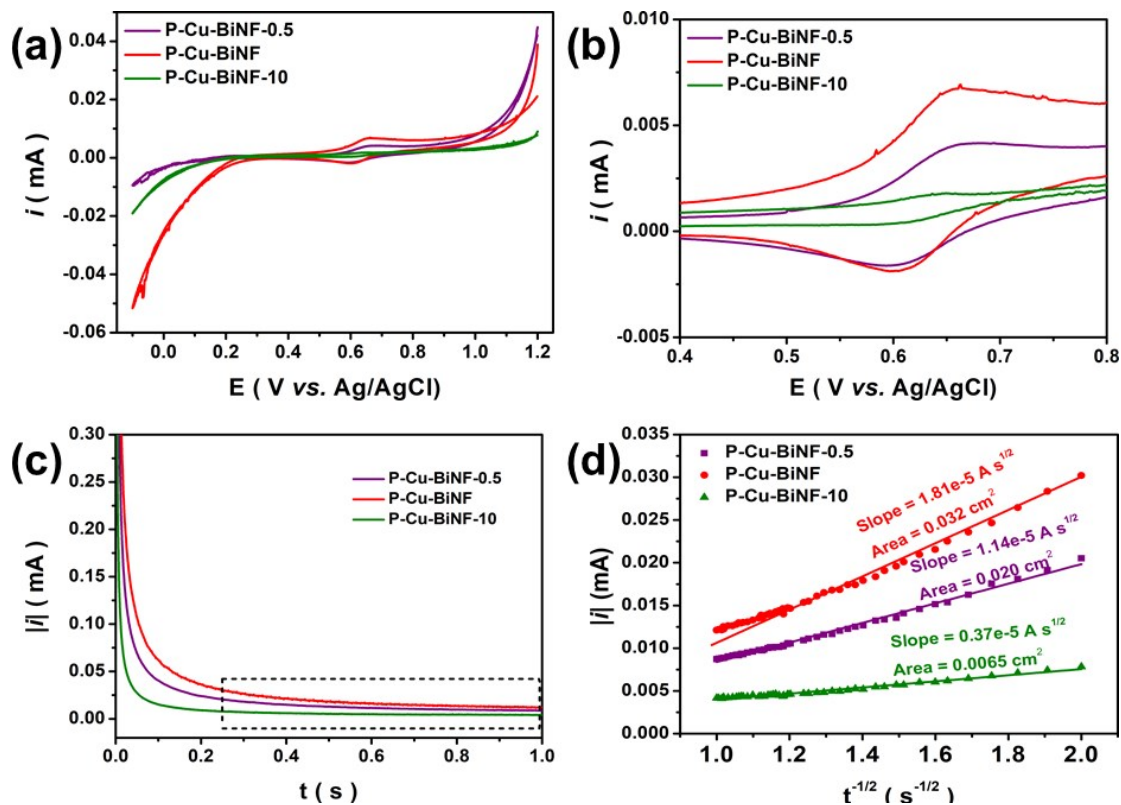

Figure S18 (a) CV curves at the sweep rate of  $5 \text{ mV s}^{-1}$  in  $0.1 \text{ M KCl}$  (containing  $5 \text{ mM K}_3\text{Fe}(\text{CN})_6$ ) over P-Cu-BiNF-0.5, P-Cu-BiNF and P-Cu-BiNF-10. (b) Chronoamperometric response recorded in  $0.1 \text{ M KCl}$  (containing  $5 \text{ mM K}_3\text{Fe}(\text{CN})_6$ ) after stepping the potential from  $0.8$  to  $0.1 \text{ V vs. Ag/AgCl}$  at P-Cu-BiNF-0.5, P-Cu-BiNF and P-Cu-BiNF-10. (c) The magnified of (a). (d) Linearized plot based on the Cottrell equation for P-Cu-BiNF-0.5, P-Cu-BiNF and P-Cu-BiNF-10 (The first  $250 \text{ ms}$  were omitted because of double layer charging effects).

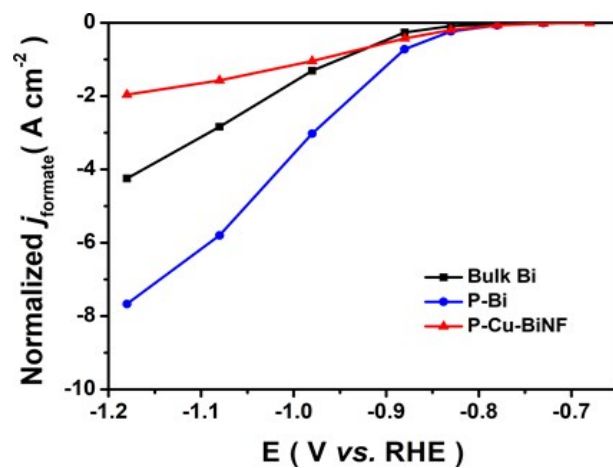

Fig. S19 Formate partial current density normalized by ECSAs of bulk Bi, P-Bi and P-Cu-BiNF.

Table S1 Performance comparison of P-Cu-BiNF with other recently reported Bi-based electrocatalysts for the CO<sub>2</sub>-to-formate conversion.

| Electrocatalysts                                      | Electrolyte                   | Potential<br>(V vs. RHE) | $j_{\text{formate}}$<br>(mA cm <sup>-2</sup> ) | FE <sub>formate</sub><br>(%) | Ref.             |
|-------------------------------------------------------|-------------------------------|--------------------------|------------------------------------------------|------------------------------|------------------|
| <b>P-Cu-BiNF</b>                                      | <b>0.5 M KHCO<sub>3</sub></b> | <b>-0.78</b>             | <b>2.4</b>                                     | <b>90.4</b>                  | <b>This work</b> |
|                                                       |                               | <b>-0.83</b>             | <b>6.8</b>                                     | <b>93.3</b>                  |                  |
|                                                       |                               | <b>-0.88</b>             | <b>14.7</b>                                    | <b>92.8</b>                  |                  |
|                                                       |                               | <b>-0.98</b>             | <b>36.0</b>                                    | <b>92.9</b>                  |                  |
|                                                       |                               | <b>-1.08</b>             | <b>55.0</b>                                    | <b>91.5</b>                  |                  |
| Commercial Bi                                         | 0.5 M KHCO <sub>3</sub>       | -0.98                    | 6.3                                            | 93.1                         |                  |
| Bismuth oxides                                        | 0.5 M KHCO <sub>3</sub>       | -0.9                     | 8                                              | 91                           | 2                |
| BOCNS                                                 | 0.5 M KHCO <sub>3</sub>       | -0.7                     | 9.35                                           | 85                           | 3                |
| Bi nanodendrite                                       | 0.5 M KHCO <sub>3</sub>       | -0.74                    | 2.4                                            | 89                           | 4                |
| Bi nanosheets                                         | 0.5 M KHCO <sub>3</sub>       | -1.74 vs. SCE            | 24                                             | >90                          | 5                |
| Bi nanoflower                                         | 0.5 M KHCO <sub>3</sub>       | -0.53 vs. SCE            | 7.5                                            | 99.2                         | 6                |
| Bi nanoparticle                                       | 0.5 M KHCO <sub>3</sub>       | -0.78                    | ~3.3                                           | 91.3                         | 7                |
| Bismuth nanoflake                                     | 0.1 M KHCO <sub>3</sub>       | -0.6                     | n.a. <sup>a</sup>                              | 99                           | 8                |
| Bi NPs/Bi <sub>2</sub> O <sub>3</sub><br>NSs with GBs | 0.5 M KHCO <sub>3</sub>       | -0.86                    | 6.2                                            | ~100                         | 9                |
| Bismuth dendrites<br>on copper mesh                   | 0.5 M KHCO <sub>3</sub>       | -1.26                    | 68.51                                          | ~100                         | 10               |
| Bi <sub>2</sub> O <sub>3</sub> -CuO <sub>(x)</sub>    | 0.5 M KHCO <sub>3</sub>       | -1.4 vs. SCE             | 9.1                                            | 89.3                         | 11               |
| SnO-Bi nanosheet                                      | 0.1 M KHCO <sub>3</sub>       | -1.7 vs. Ag/AgCl         | 12                                             | 93                           | 12               |
| CuBi                                                  | 0.5 M KHCO <sub>3</sub>       | -1.5                     | ~60                                            | ~90                          | 13               |
| Zn-Bi<br>nanoparticles                                | 0.5 M KHCO <sub>3</sub>       | -0.8                     | n.a.                                           | 94                           | 14               |
| Cu-Bi<br>microspheres                                 | 0.5 M KHCO <sub>3</sub>       | -0.93                    | ~6                                             | 95                           | 15               |
| Nano-Bi on<br>Copper foil                             | 0.1 M KHCO <sub>3</sub>       | -0.89                    | 2.8                                            | 91.3                         | 16               |

<sup>a</sup> n.a. means no available data.

**Note:** If the FE<sub>formate</sub> and  $j_{\text{formate}}$  values are not specifically stated, they are derived from graphical results or calculated with the available information

## References

1. H. Liang, S. Zhao, X. Hu, M. Ceccato, T. Skrydstrup, K. Daasbjerg, Hydrophobic Copper Interfaces Boost Electroreduction of Carbon Dioxide to Ethylene in Water, *ACS Catal.*, 2021, **11**, 958-966.
2. P. Deng, H. Wang, R. Qi, J. Zhu, S. Chen, F. Yang, L. Zhou, K. Qi, H. Liu and B. Y. Xia, Bismuth Oxides with Enhanced Bismuth–Oxygen Structure for Efficient Electrochemical Reduction of Carbon Dioxide to Formate, *ACS Catal.*, 2020, **10**, 743-750.
3. Y. Zhang, X. Zhang, Y. Ling, F. Li, A. M. Bond and J. Zhang, Controllable Synthesis of Few-Layer Bismuth Subcarbonate by Electrochemical Exfoliation for Enhanced CO<sub>2</sub> Reduction Performance, *Angew. Chem. Int. Ed.*, 2018, **57**, 13283-13287.
4. J. H. Koh, D. H. Won, T. Eom, N.-K. Kim, K. D. Jung, H. Kim, Y. J. Hwang and B. K. Min, Facile CO<sub>2</sub> Electro-Reduction to Formate via Oxygen Bidentate Intermediate Stabilized by High-Index Planes of Bi Dendrite Catalyst, *ACS Catal.*, 2017, **7**, 5071-5077.
5. N. Han, Y. Wang, H. Yang, J. Deng, J. Wu, Y. Li and Y. Li, Ultrathin bismuth nanosheets from in situ topotactic transformation for selective electrocatalytic CO<sub>2</sub> reduction to formate, *Nat. Commun.*, 2018, **9**, 1320.
6. Y. Qiu, J. Du, C. Dai, W. Dong and C. Tao, Bismuth Nano-Flowers as a Highly Selective Catalyst for Electrochemical Reduction of CO<sub>2</sub> to Formate, *J. Electrochem. Soc.*, 2018, **165**, H594-H600.
7. X. Zhang, X. Hou, Q. Zhang, Y. Cai, Y. Liu and J. Qiao, Polyethylene glycol induced reconstructing Bi nanoparticle size for stabilized CO<sub>2</sub> electroreduction to formate, *J. Catal.*, 2018, **365**, 63-70.
8. S. Kim, W. J. Dong, S. Gim, W. Sohn, J. Y. Park, C. J. Yoo, H. W. Jang and J.-L. Lee, Shape-controlled bismuth nanoflakes as highly selective catalysts for electrochemical carbon dioxide reduction to formate, *Nano Energy*, 2017, **39**, 44-52.
9. L. Li, D.-K. Ma, F. Qi, W. Chen and S. Huang, Bi nanoparticles/Bi<sub>2</sub>O<sub>3</sub>

- nanosheets with abundant grain boundaries for efficient electrocatalytic CO<sub>2</sub> reduction, *Electrochim. Acta*, 2019, **298**, 580-586.
10. C. Zhu, Q. Wang and C. Wu, Rapid and scalable synthesis of bismuth dendrites on copper mesh as a high-performance cathode for electroreduction of CO<sub>2</sub> to formate, *J. CO<sub>2</sub> Util.*, 2020, **36**, 96-104.
  11. C. Dai, Y. Qiu, Y. He, Q. Zhang, R. Liu, J. Du and C. Tao, Controlled synthesis of a Bi<sub>2</sub>O<sub>3</sub>-CuO catalyst for selective electrochemical reduction of CO<sub>2</sub> to formate, *New J. Chem.*, 2019, **43**, 3493-3499.
  12. X. An, S. Li, A. Yoshida, T. Yu, Z. Wang, X. Hao, A. Abudula and G. Guan, Bi-Doped SnO Nanosheets Supported on Cu Foam for Electrochemical Reduction of CO<sub>2</sub> to HCOOH, *ACS Appl. Mater. Inter.*, 2019, **11**, 42114-42122.
  13. M. Y. Zu, L. Zhang, C. Wang, L. R. Zheng and H. G. Yang, Copper-modulated bismuth nanocrystals alter the formate formation pathway to achieve highly selective CO<sub>2</sub> electroreduction, *J. Mater. Chem. A*, 2018, **6**, 16804-16809.
  14. T. Zhang, Y. Qiu, P. Yao, X. Li and H. Zhang, Bi-Modified Zn Catalyst for Efficient CO<sub>2</sub> Electrochemical Reduction to Formate, *ACS Sustain. Chem. Eng.*, 2019, **7**, 15190-15196.
  15. L. Jia, H. Yang, J. Deng, J. Chen, Y. Zhou, P. Ding, L. Li, N. Han and Y. Li, Copper-Bismuth Bimetallic Microspheres for Selective Electrocatalytic Reduction of CO<sub>2</sub> to Formate, *Chinese J. Chem.*, 2019, **37**, 497-500.
  16. W. Lv, J. Zhou, J. Bei, R. Zhang, L. Wang, Q. Xu and W. Wang, Electrodeposition of nano-sized bismuth on copper foil as electrocatalyst for reduction of CO<sub>2</sub> to formate, *Appl. Surf. Sci.*, 2017, **393**, 191-196.
